# Supplementary material for: Correlating processing induced orientation with tensile properties for mass polymerized acrylonitrile butadiene styrene test specimens
Source: Royal Society of Chemistry journal article supplement (doi:10.1039/d4lp00238e), 2024-01-01
Supplement: d4lp00238e1.pdf [file d4lp00238e1.pdf]

## SUPPLEMENTARY INFORMATION

### Correlating Processing Induced Orientation with Tensile Properties for Mass Polymerized Acrylonitrile Butadiene Styrene Test Specimens

Received 00th January 20xx,  
Accepted 00th January 20xx

DOI: 10.1039/x0xx00000x

E. Fernandez<sup>a</sup>, M. Edeleva<sup>a†</sup>, L. Cardon<sup>a</sup>, D. R. D'hooge<sup>b,c</sup>

| Specimen N°    | Modulus (MPa) | 0.2% Offset Stress (MPa) | 0.2% Offset Strain (%) | Yield Stress (MPa) | Yield Strain (%) | Break Strain (%) |
|----------------|---------------|--------------------------|------------------------|--------------------|------------------|------------------|
| 1              | 1890          | 35.8                     | 1.94                   | 38.1               | 2.35             | 45.6             |
| 2              | 1860          | 37.4                     | 2.08                   | 38.1               | 2.33             | 47.2             |
| 3              | 1880          | 36.5                     | 1.99                   | 38.1               | 2.31             | 47.8             |
| 4              | 1890          | 36                       | 1.97                   | 38.1               | 2.4              | 58.4             |
| 5              | 1880          | 35.8                     | 1.95                   | 38.1               | 2.38             | 39.2             |
| 6              | 1880          | 36.7                     | 2.01                   | 38.2               | 2.31             | 44               |
| 7              | 1880          | 35.5                     | 1.93                   | 37.9               | 2.38             | 51.6             |
| 8              | 1880          | 36.9                     | 2.01                   | 38.7               | 2.39             | 38.7             |
| 9              | 1910          | 36.4                     | 1.96                   | 38.4               | 2.35             | 41.8             |
| <b>Average</b> | <b>1883.3</b> | <b>36.3</b>              | <b>1.98</b>            | <b>38.2</b>        | <b>2.36</b>      | <b>46.0</b>      |
| SD             | 4.5           | 0.7                      | 0.05                   | 0.1                | 0.04             | 0.1              |

**S1:** Tensile results of ISO 527 1A samples: injection moulded + annealed: tested with a crosshead velocity of 1 mm/min for modulus determination and 50 mm/min after 0.3% strain.

<sup>a</sup> Centre for Polymer and Material Technologies, Department of Materials, Textile and Chemical Engineering, Ghent University, 9000 Gent, Belgium Address here.

<sup>b</sup> Laboratory for Chemical Technology, Department of Materials, Textile and Chemical Engineering, Ghent University, 9000 Gent, Belgium

<sup>c</sup> Centre for Textile Science and Engineering, Department of Materials, Textile and Chemical Engineering, Ghent University, 9000 Gent, Belgium

† mariya.edeleva@ugent.be

Electronic Supplementary Information (ESI) available: [details of any supplementary information available should be included here]. See DOI: 10.1039/x0xx00000x

| Specimen N°    | Modulus (MPa) | 0.2% Offset Stress (MPa) | 0.2% Offset Strain (%) | Yield Stress (MPa) | Yield Strain (%) | Break Strain (%) |
|----------------|---------------|--------------------------|------------------------|--------------------|------------------|------------------|
| 1              | 1900          | 42.6                     | 2.31                   | 42.9               | 2.31             | 23.6             |
| 2              | 1860          | 42.3                     | 2.35                   | 42.4               | 2.35             | 35.5             |
| 3              | 1830          | 42.8                     | 2.42                   | 42.9               | 2.42             | 34.5             |
| 4              | 1920          | 42.4                     | 2.26                   | 42.4               | 2.26             | 30.9             |
| 5              | 1930          | 41.9                     | 2.24                   | 41.9               | 2.24             | 40.2             |
| 6              | 1890          | 42.8                     | 2.33                   | 42.8               | 2.33             | 35.2             |
| 7              | 1920          | 42.4                     | 2.29                   | 42.4               | 2.29             | 32.4             |
| 8              | 1950          | 42.3                     | 2.23                   | 42.3               | 2.23             | 24.8             |
| <b>Average</b> | <b>1900.0</b> | <b>42.44</b>             | <b>2.30</b>            | <b>42.50</b>       | <b>2.30</b>      | <b>32.14</b>     |
| SD             | 39.3          | 0.30                     | 0.06                   | 0.34               | 0.06             | 5.60             |

S2: Tensile results of ISO 527 1BA samples: injection moulded + annealed: tested with a crosshead velocity of 1 mm/min for modulus determination and 50 mm/min after 0.3% strain.

| Specimen N°    | Modulus (MPa) | 0.2% Offset Stress (MPa) | 0.2% Offset Strain (%) | Yield Stress (MPa) | Yield Strain (%) | Break Strain (%) |
|----------------|---------------|--------------------------|------------------------|--------------------|------------------|------------------|
| 1              | 2020          | 36.3                     | 1.84                   | 40.8               | 2.36             | 49.7             |
| 2              | 1950          | 37.5                     | 1.98                   | 41.4               | 2.45             | 44.3             |
| 3              | 1960          | 35.3                     | 1.84                   | 41.3               | 2.48             | 43.4             |
| 4              | 1890          | 38.6                     | 2.1                    | 41.4               | 2.49             | 50.7             |
| 5              | 1800          | 40.5                     | 2.32                   | 41.5               | 2.52             | 53.3             |
| 6              | 1910          | 37                       | 1.98                   | 40.9               | 2.48             | 48.3             |
| 7              | 1910          | 35.4                     | 1.89                   | 40.4               | 2.45             | 54.5             |
| 8              | 1920          | 37.7                     | 2.01                   | 41.2               | 2.46             | 50               |
| <b>Average</b> | <b>1920.0</b> | <b>37.3</b>              | <b>2.00</b>            | <b>41.1</b>        | <b>2.46</b>      | <b>49.3</b>      |
| SD             | 63.3          | 1.7                      | 0.16                   | 0.4                | 0.05             | 3.9              |

S3: Tensile results of ISO 527 1BA samples: injection moulded + annealed: tested with a crosshead velocity of 0.333 mm/min for modulus determination and 16.7 mm/min after 0.3% strain.

| Specimen N°    | Modulus (MPa) | 0.2% Offset Stress (MPa) | 0.2% Offset Strain (%) | Yield Stress (MPa) | Yield Strain (%) | Break Strain (%) |
|----------------|---------------|--------------------------|------------------------|--------------------|------------------|------------------|
| 1              | 1890          | 40.4                     | 2.2                    | 42.1               | 2.52             | 38.9             |
| 2              | 1860          | 41.3                     | 2.27                   | 41.9               | 2.45             | 47.1             |
| 3              | 1940          | 40.7                     | 2.17                   | 42                 | 2.44             | 53               |
| 4              | 1900          | 40.1                     | 2.16                   | 41.8               | 2.45             | 35.4             |
| 5              | 1940          | 40.1                     | 2.12                   | 41.9               | 2.4              | 56.1             |
| 6              | 1910          | 41                       | 2.21                   | 41.8               | 2.46             | 46.2             |
| 7              | 1910          | 40.5                     | 2.17                   | 41.9               | 2.43             | 51.1             |
| 8              | 1910          | 40.1                     | 2.15                   | 41.4               | 2.41             | 38.3             |
| <b>Average</b> | <b>1907.5</b> | <b>40.53</b>             | <b>2.18</b>            | <b>41.85</b>       | <b>2.45</b>      | <b>45.76</b>     |
| SD             | 26.1          | 0.45                     | 0.05                   | 0.21               | 0.04             | 7.56             |

S4: Tensile results of ISO 527 1BA samples: injection moulded + annealed: tested with a crosshead velocity of 0.52 mm/min for modulus determination and 26 mm/min after 0.3% strain.

| Specimen N°    | Modulus (MPa) | 0.2% Offset Stress (MPa) | 0.2% Offset Strain (%) | Yield Stress (MPa) | Yield Strain (%) | Break Strain (%) |
|----------------|---------------|--------------------------|------------------------|--------------------|------------------|------------------|
| 1              | 1920          | 35.2                     | 1.89                   | 39.1               | 2.51             | 50.1             |
| 2              | 1900          | 35                       | 1.89                   | 38.9               | 2.51             | 55.9             |
| 3              | 1920          | 34.7                     | 1.86                   | 38.9               | 2.54             | 49.7             |
| 4              | 1910          | 35.5                     | 1.91                   | 39                 | 2.46             | 55.6             |
| 5              | 1910          | 35.2                     | 1.89                   | 38.9               | 2.53             | 50.4             |
| 6              | 1920          | 35.4                     | 1.89                   | 38.9               | 2.47             | 39.3             |
| 7              | 1910          | 34.8                     | 1.87                   | 38.8               | 2.54             | 38.7             |
| 8              | 1920          | 34.5                     | 1.84                   | 38.8               | 2.53             | 65.8             |
| <b>Average</b> | <b>1913.8</b> | <b>35.0</b>              | <b>1.88</b>            | <b>38.9</b>        | <b>2.51</b>      | <b>50.7</b>      |
| SD             | 7.4           | 0.4                      | 0.02                   | 0.1                | 0.03             | 8.9              |

S5: Tensile results of ISO 527 1A samples: injection moulded with no post treatment: tested with a crosshead velocity of 1 mm/min for modulus determination and 50 mm/min after 0.3% strain.

| Specimen N°    | Modulus (MPa) | 0.2% Offset Stress (MPa) | 0.2% Offset Strain (%) | Yield Stress (MPa) | Yield Strain (%) | Break Strain (%) |
|----------------|---------------|--------------------------|------------------------|--------------------|------------------|------------------|
| 1              | 1860          | 37.1                     | 2.04                   | 41.9               | 2.66             | 20.7             |
| 2              | 1790          | 37.9                     | 2.16                   | 41.4               | 2.72             | 24.1             |
| 3              | 1960          | 34.4                     | 1.8                    | 41.6               | 2.63             | 19.1             |
| 4              | 2020          | 32                       | 1.63                   | 41.4               | 2.63             | 19.9             |
| 5              | 2030          | 32.1                     | 1.64                   | 41.6               | 2.65             | 16.9             |
| 6              | 2020          | 32.1                     | 1.64                   | 41.2               | 2.61             | 34.6             |
| 7              | 2060          | 31.9                     | 1.6                    | 41.5               | 2.61             | 22.8             |
| 8              | 1780          | 37.8                     | 2.17                   | 41.2               | 2.72             | 36.7             |
| 9              | 2000          | 33                       | 1.71                   | 41.6               | 2.68             | 19.3             |
| 10             | 1990          | 32.6                     | 1.68                   | 41.6               | 2.67             | 21.2             |
| <b>Average</b> | <b>1951</b>   | <b>34.1</b>              | <b>1.81</b>            | <b>41.5</b>        | <b>2.66</b>      | <b>23.5</b>      |
| SD             | 102.8         | 2.5                      | 0.23                   | 0.2                | 0.04             | 6.7              |

S6: Tensile results of ISO 527 1BA samples: injection moulded with no post treatment: tested with a crosshead velocity of 0.33 mm/min for modulus determination and 16.7 mm/min after 0.3% strain.

| Specimen N°    | Modulus (MPa) | 0.2% Offset Stress (MPa) | 0.2% Offset Strain (%) | Yield Stress (MPa) | Yield Strain (%) | Break Strain (%) |
|----------------|---------------|--------------------------|------------------------|--------------------|------------------|------------------|
| 1              | 1936          | 35.7                     | 2.02                   | 41.7               | 3.75             | 70.5             |
| 2              | 1964          | 36.6                     | 1.97                   | 42.5               | 3.84             | 45.6             |
| 3              | 1620          | 37.9                     | 2.57                   | 40.9               | 4.08             | 43.1             |
| 4              | 1725          | 33.6                     | 2.14                   | 41.3               | 4.33             | 45.3             |
| 5              | 1707          | 35.0                     | 2.25                   | 40.3               | 3.97             |                  |
| 6              | 1665          | 35.9                     | 2.37                   | 41.8               | 4.36             | 55.8             |
| 7              | 1684          | 34.5                     | 2.25                   | 39.5               | 3.97             | 51.2             |
| <b>Average</b> | <b>1770</b>   | <b>35.8</b>              | <b>2.22</b>            | <b>41.4</b>        | <b>4.05</b>      | <b>54.0</b>      |
| SD             | 145           | 1.4                      | 0.23                   | 0.8                | 0.25             | 11.3             |

S7: Tensile results of ISO 527 1BA samples: injection moulded in a steel mould @ 60mm/s with no additional post treatment: tested with a crosshead velocity of 1 mm/min for modulus determination and 50 mm/min after 0.3% strain.

| Sample             | Width (mm)   |              | Thickness (mm) |              | Surface (mm <sup>2</sup> ) |               | Decrease (%)  |
|--------------------|--------------|--------------|----------------|--------------|----------------------------|---------------|---------------|
|                    | Initial      | Neck         | Initial        | Neck         | Initial                    | Neck          | Surface       |
| 1A-1               | 9.958        | 9.138        | 3.928          | 3.594        |                            |               |               |
| 1A-2               | 9.97         | 9.258        | 3.963          | 3.618        |                            |               |               |
| 1A-3               | 9.973        | 9.061        | 3.941          | 3.537        |                            |               |               |
| <b>Average 1A</b>  | <b>9.967</b> | <b>9.152</b> | <b>3.944</b>   | <b>3.583</b> | <b>39.310</b>              | <b>32.793</b> | <b>16.579</b> |
| SD 1A              | 0.008        | 0.099        | 0.018          | 0.042        | <b>0.013</b>               | <b>0.070</b>  |               |
| 1BA-1              | 5.055        | 4.717        | 1.932          | 1.776        |                            |               |               |
| 1BA-2              | 5.082        | 4.704        | 1.932          | 1.83         |                            |               |               |
| 1BA-3              | 4.999        | 4.600        | 2.001          | 1.84         |                            |               |               |
| <b>Average 1BA</b> | <b>5.045</b> | <b>4.674</b> | <b>1.955</b>   | <b>1.815</b> | <b>9.864</b>               | <b>8.484</b>  | <b>13.985</b> |
| SD 1BA             | 0.042        | 0.064        | 0.040          | 0.034        | <b>0.041</b>               | <b>0.049</b>  |               |

**S10:** Cross section measurements to compare the amount of necking between annealed ISO 527 1A and 1BA samples, tensile tests of both sample types were stopped at 25% strain. Prior to the test, the thickness and width were measured. With the sample still inserted between the clamps at 25% strain, which is done to avoid elastic relaxation of the tensile sample, the thickness of the sample is measured again at its thinnest location. These measurements were repeated three times with the optimal cross head velocity for 1A bars (1 mm/min and 50 mm/min) and 1BA bars (0.333 mm/min and 16.666 mm/min).

**S8:** Tensile results of ISO 527 1BA samples: injection moulded in a steel mould @ 10mm/s with no additional post treatment: tested with a crosshead velocity of 1 mm/min for modulus determination and 50 mm/min after 0.3% strain.

All standard specimens were injection molded with an injection velocity of 60 mm/s (forward movement of the screw). To emphasize on processing related orientation however, an injection velocity of 10 mm/s has also been applied to produce the smaller ISO 527 1BA test bars in the steel mold.

| Specimen N°    | Modulus (MPa) | 0.2% Offset Stress (MPa) | 0.2% Offset Strain (%) | Yield Stress (MPa) | Yield Strain (%) | Break Strain (%) |
|----------------|---------------|--------------------------|------------------------|--------------------|------------------|------------------|
| 1              | 1868.18       | 34.9                     | 2.07                   | 41.5               | 4.19             | 10.7             |
| 2              | 1892.56       | 34.3                     | 2.00                   | 41.3               | 3.84             | 9.9              |
| 3              | 1860.26       | 35.5                     | 2.09                   | 42.1               | 4.21             | 11.0             |
| 4              | 1850.23       | 36.6                     | 2.19                   | 43.6               | 4.39             | 12.6             |
| 5              | 1927.03       | 36.9                     | 2.11                   | 41.8               | 3.79             |                  |
| 6              | 1913.99       | 35.5                     | 2.04                   | 42.5               | 4.09             | 10.6             |
| 7              | 1920.36       | 36.5                     | 2.10                   | 42.5               | 4.04             | 11.4             |
| <b>Average</b> | <b>1890</b>   | <b>35.7</b>              | <b>2.15</b>            | <b>42.2</b>        | <b>4.14</b>      | <b>10.7</b>      |
| SD             | 31            | 1.0                      | 0.19                   | 0.9                | 0.26             | 1.1              |

**S9:** Tensile results of ISO 527 1BA samples: injection moulded in a multi jet fusion polyamide 11 mould @ 10mm/s with no additional post treatment: tested with a crosshead velocity of 1 mm/min for modulus determination and 50 mm/min after 0.3% strain.

To broaden the investigation, parts have also been made at an injection velocity of 10 mm/s in a polyamide 11 (PA11) mold made via multi jet fusion (MJF). Since the thermal conductivity of this alternative mold material is much lower than conventional mold steel, different flow and cooling behavior may be expected. Furthermore, this mold has a higher surface roughness.
